# Supplementary material for: DNA-mediated self-assembly of taste cells and neurons for taste signal transmission
Source: Royal Society of Chemistry journal article supplement (doi:10.1039/c8bm00873f), 2018-01-01
Supplement: c8bm00873f5.pdf [file c8bm00873f5.pdf]

## Supporting Information

### **DNA-mediated Self-assembly of Taste Cells and Neurons for Taste Signal Transmission**

Junsu Yun,<sup>a</sup> Ann-Na Cho,<sup>b</sup> Seung-Woo Cho,<sup>\*,b</sup> and Yoon Sung Nam<sup>\*\*,a,c</sup>

a. Department of Materials Science and Engineering, Korea Advanced Institute of Science and Technology, 291 Daehak-ro, Yuseong-gu, Daejeon, 34141, Republic of Korea,

b. Department of Biotechnology, Yonsei University, 50 Yonsei-ro, Seodaemun-gu, Seoul, 03722, Republic of Korea

c. KAIST Institute for NanoCentury, Korea Advanced Institute of Science and Technology, 291 Daehak-ro, Yuseong-gu, Daejeon, 34141, Republic of Korea

Corresponding Authors E-mails: seungwoocho@yonsei.ac.kr (S.W.C.) and

yoonsung@kaist.ac.kr (Y.S.N.)

## Supporting Figures

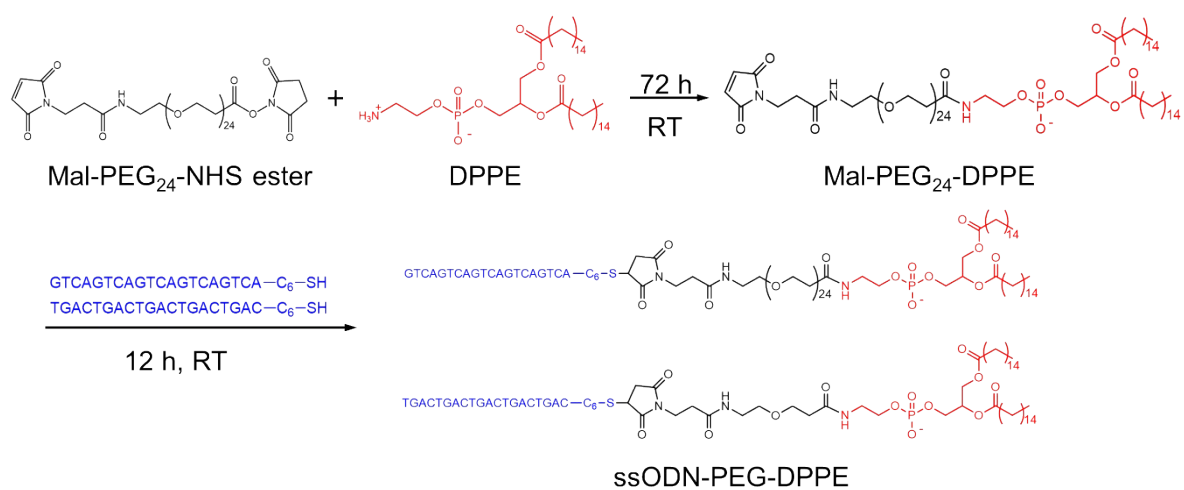

**Fig. S1** Synthetic scheme of DNA-lipid conjugate (ssODN-PEG-DPPE).

(1) Neonatal mouse (2 days)

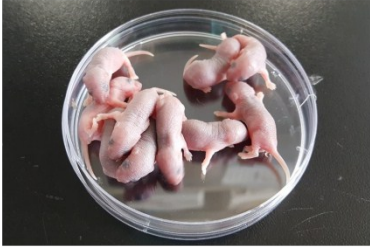

(2) Cut the tongues of mouse

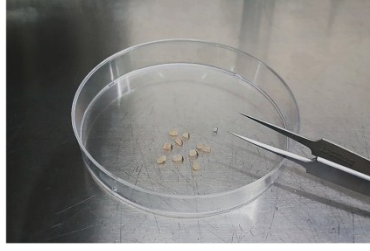

(3) Slice tongues in small tissues

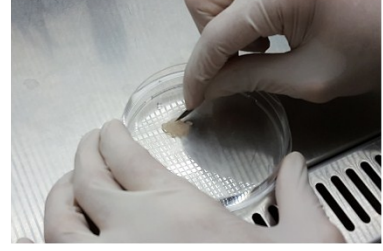

(4) Digest the tissues for 15 min and

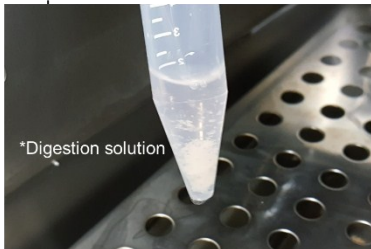

\*Mixture of trypsin/EDTA, Accutase®, and DNase I

(5) Seed tissues to collagen I coated plate

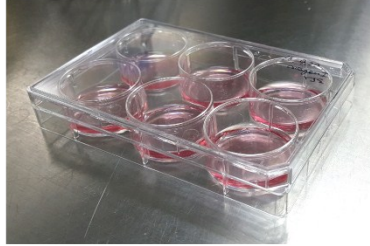

(6) Incubate the tissues for 4~5 days

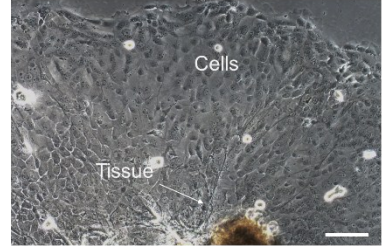

(7) Sub-culture #1 (Incubated for 2 days)

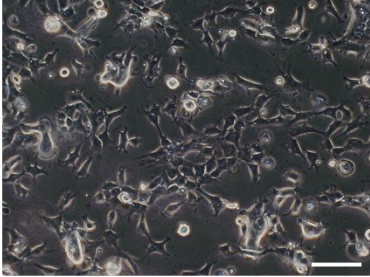

(8) Transfer to the experimental plate

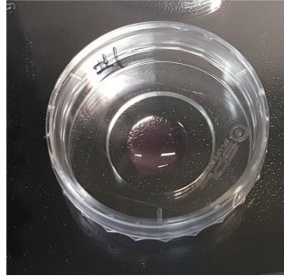

(9) Sub-culture #2 (Incubate for 3 days)

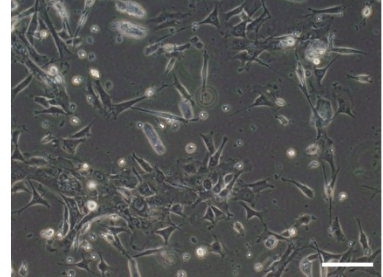

**Fig. S2** Procedures of primary taste cell culture. Scale bar = 100  $\mu\text{m}$

**(1) (GTCA)<sub>5</sub>-PEG-DPPE to neuronal cell**

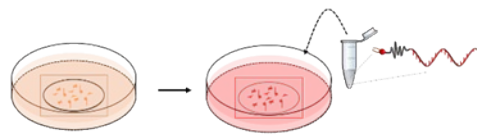

Mix DNA solutions and  
incubate for 60 min at 37 °C

**(2) (TGAC)<sub>5</sub>-PEG-DPPE to taste cell**

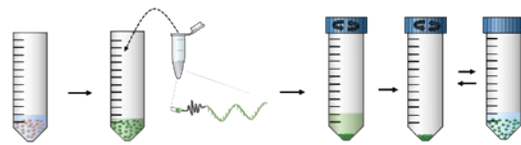

Mix DNA solutions and  
incubate for 30 min at 37 °C

Remove remaining DNA  
and ssODN-PEG-DPPE

**(3) Neuronal and taste cell assembly by DNA hybridization**

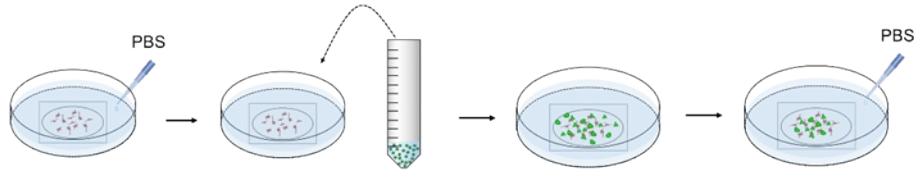

Remove remaining DNA  
and ssODN-PEG-DPPE

Mix taste cells on neuronal cells and  
incubate for 30 min at 25 °C

Remove unattached cells

**Fig. S3** Schematic images of procedure of DNA-mediated taste and neuronal cell assembly.

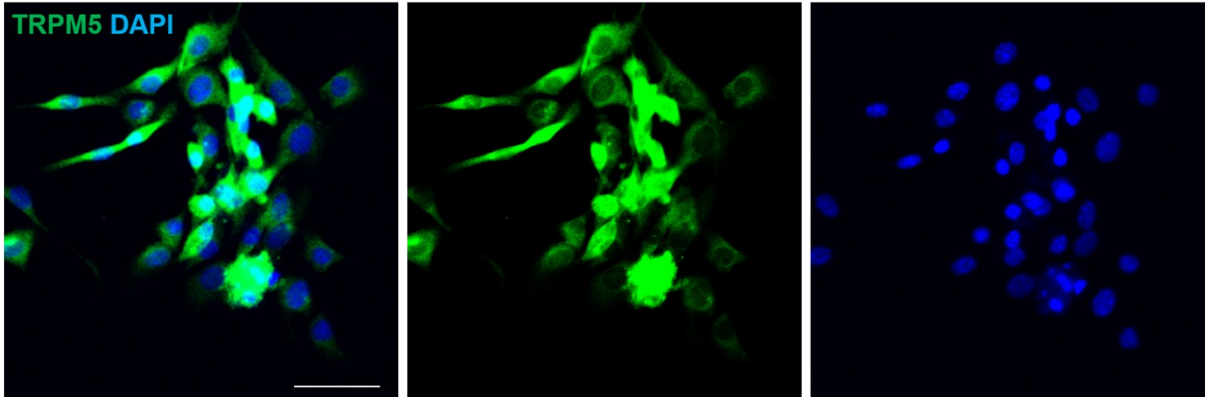

**Fig. S4** TRPM5 immunostaining of taste cells cultured in TM. Scale bar = 50  $\mu$ m

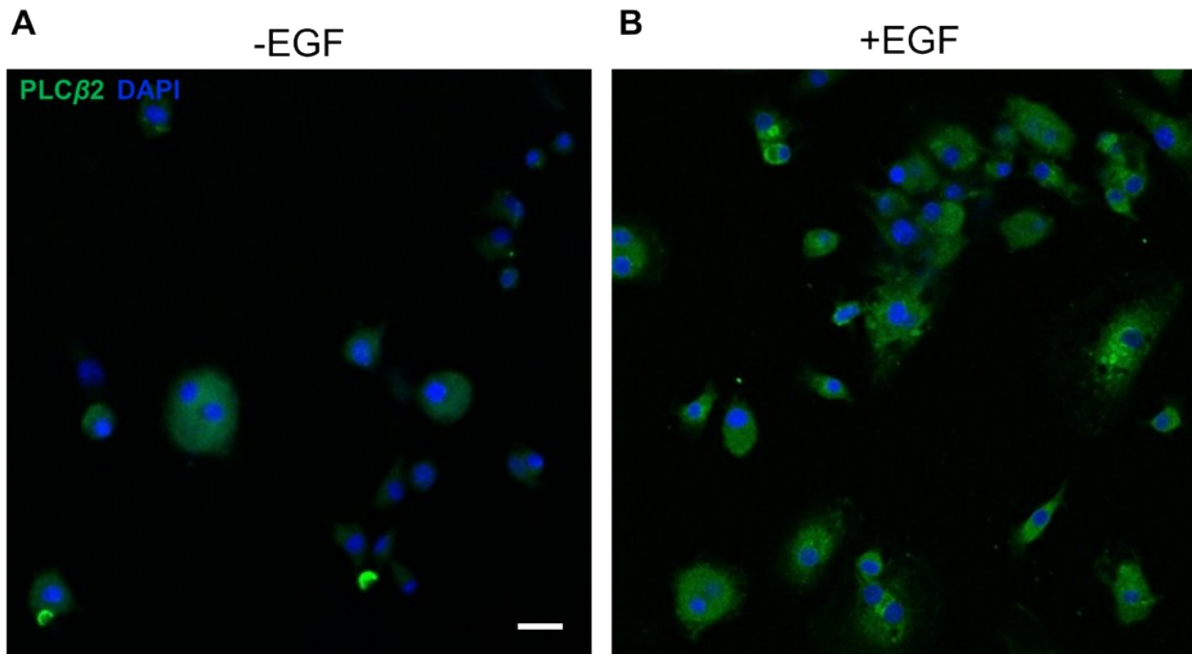

**Fig. S5** PLC $\beta$ 2 immunostaining of taste cells cultured in (A) EGF-free TM and (B) TM. Taste cells cultured in TM show higher expression level of PLC $\beta$ 2 than taste cells in EGF-free TM.

Scale bar = 100  $\mu$ m

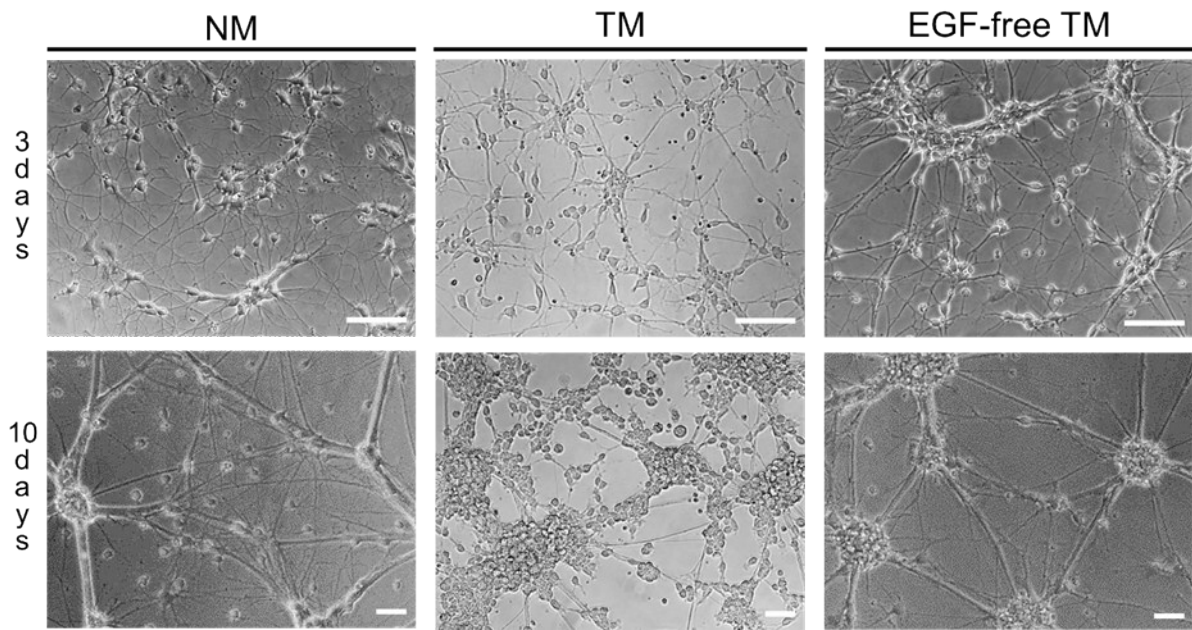

**Fig. S6** Culture of neurons in three different culture media. Scale bar = 100  $\mu\text{m}$

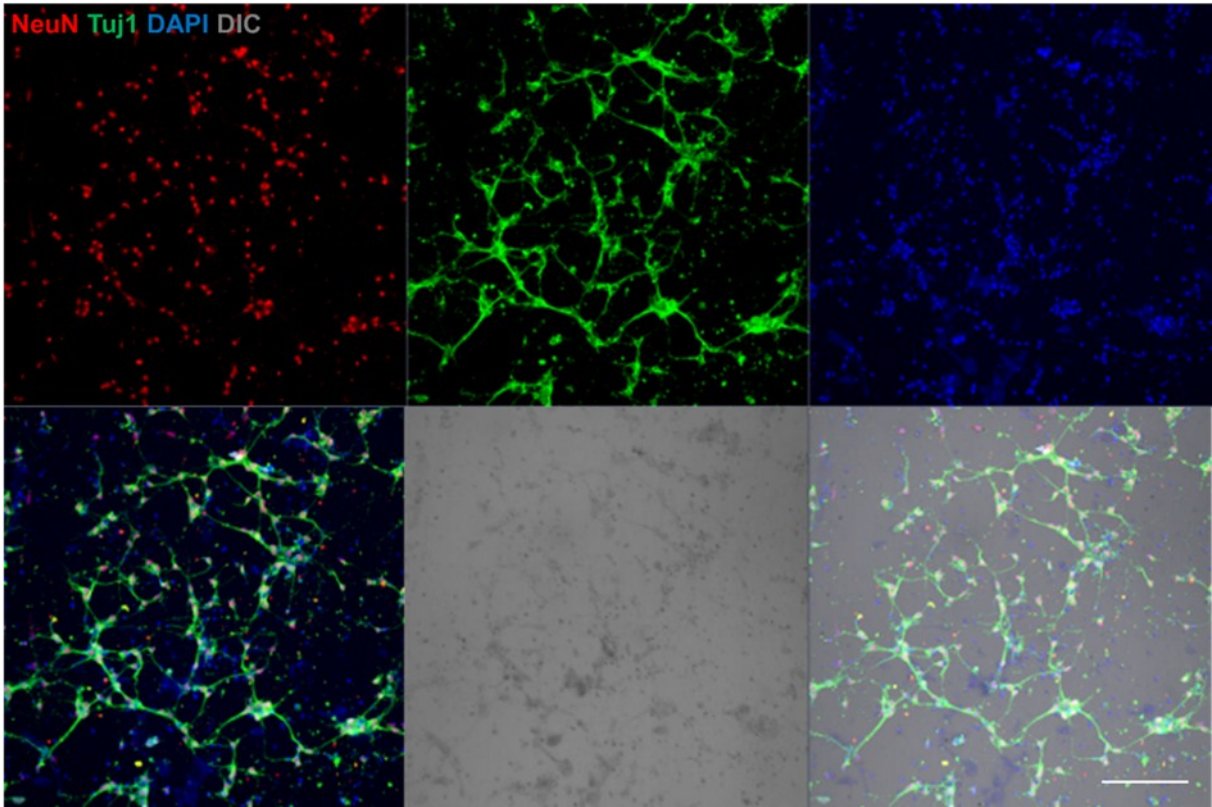

**Fig. S7** Immunostaining of neurons cultured in EGF-free TM. Scale bar = 100  $\mu\text{m}$



**Supporting Movies**

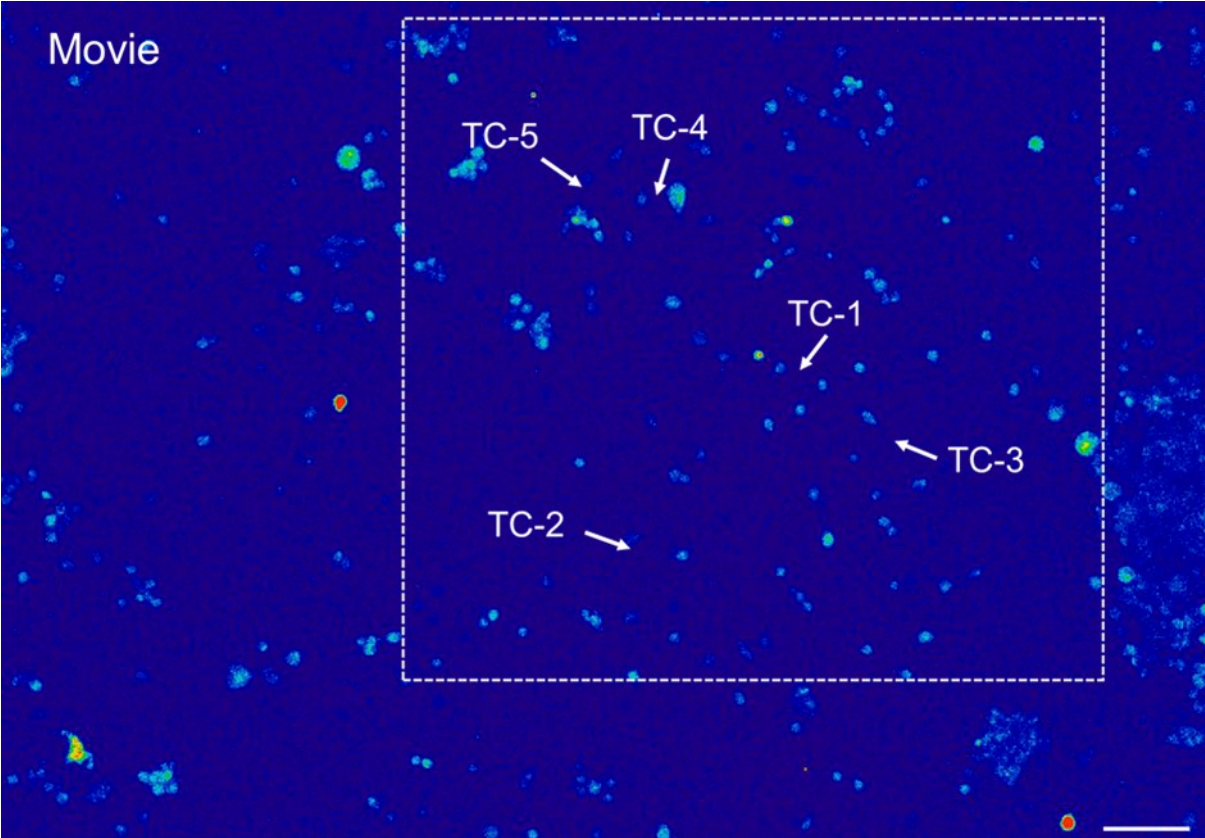

Movie S1. Movie clip of calcium imaging of taste cells (30× fast, Figure 4). Scale bar = 100 μm.

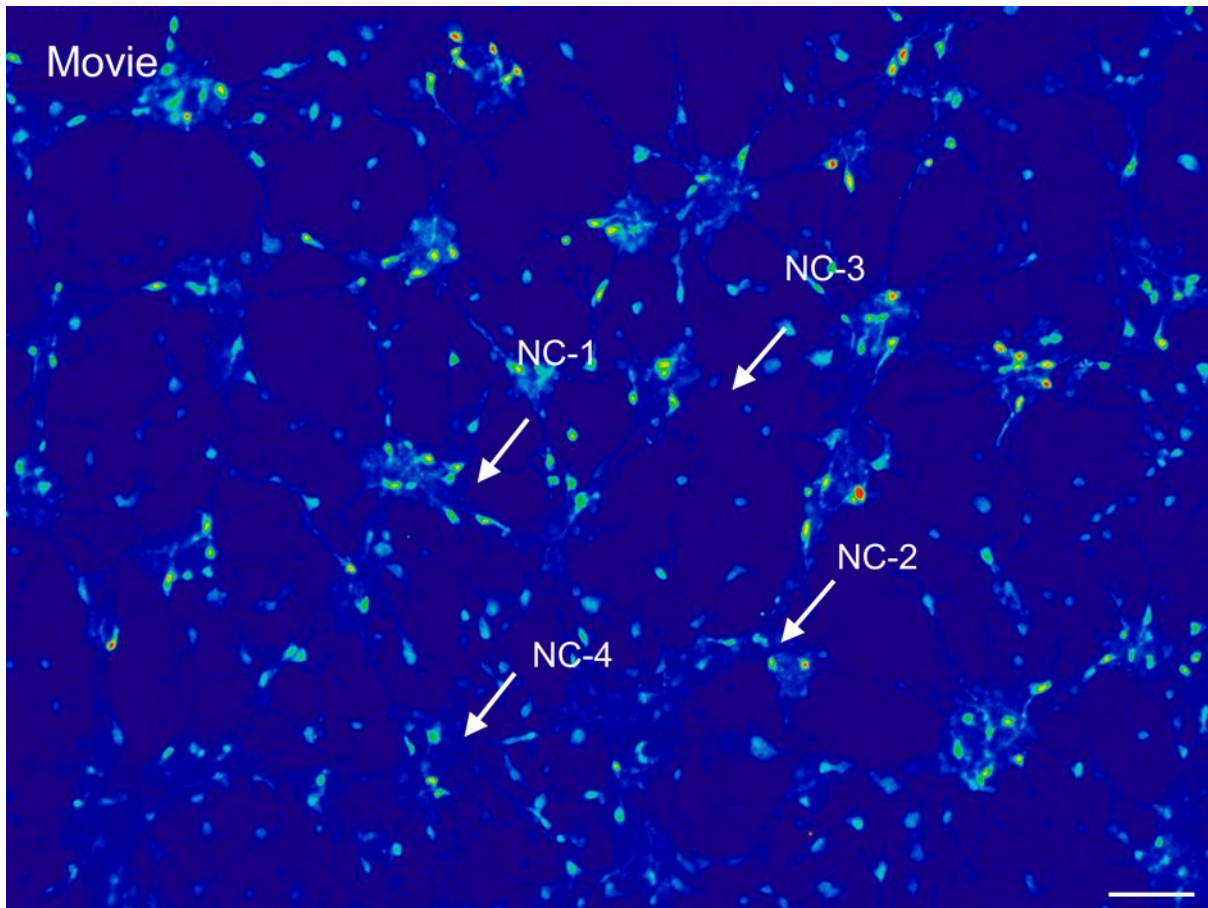

**Movie S2.** Movie clip of calcium imaging of neuronal cells (30× fast, Figure 5). Scale bar = 50  $\mu\text{m}$ .

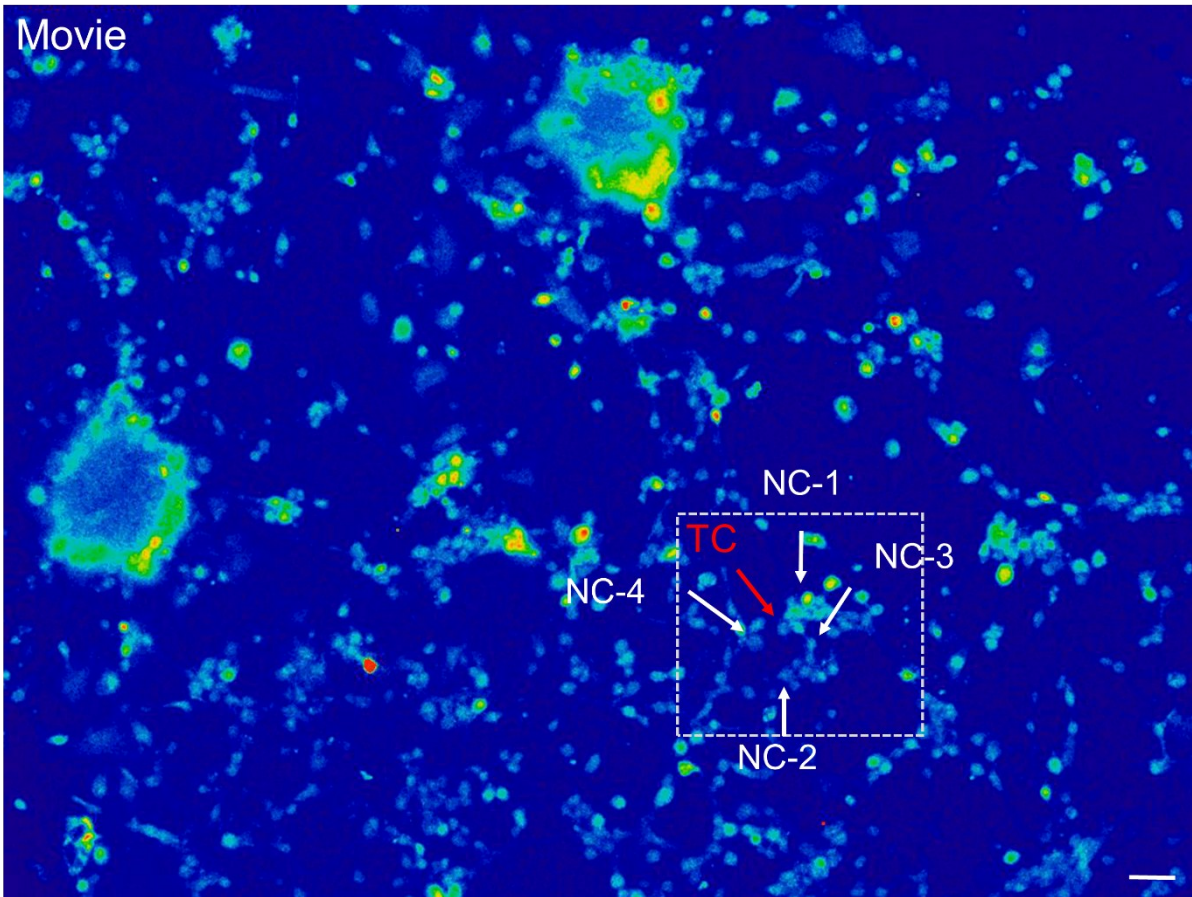

**Movie S3.** Movie clip of calcium imaging of simply mixed taste and neuronal cells (30× fast, Figure 6). Scale bar = 50  $\mu\text{m}$ .

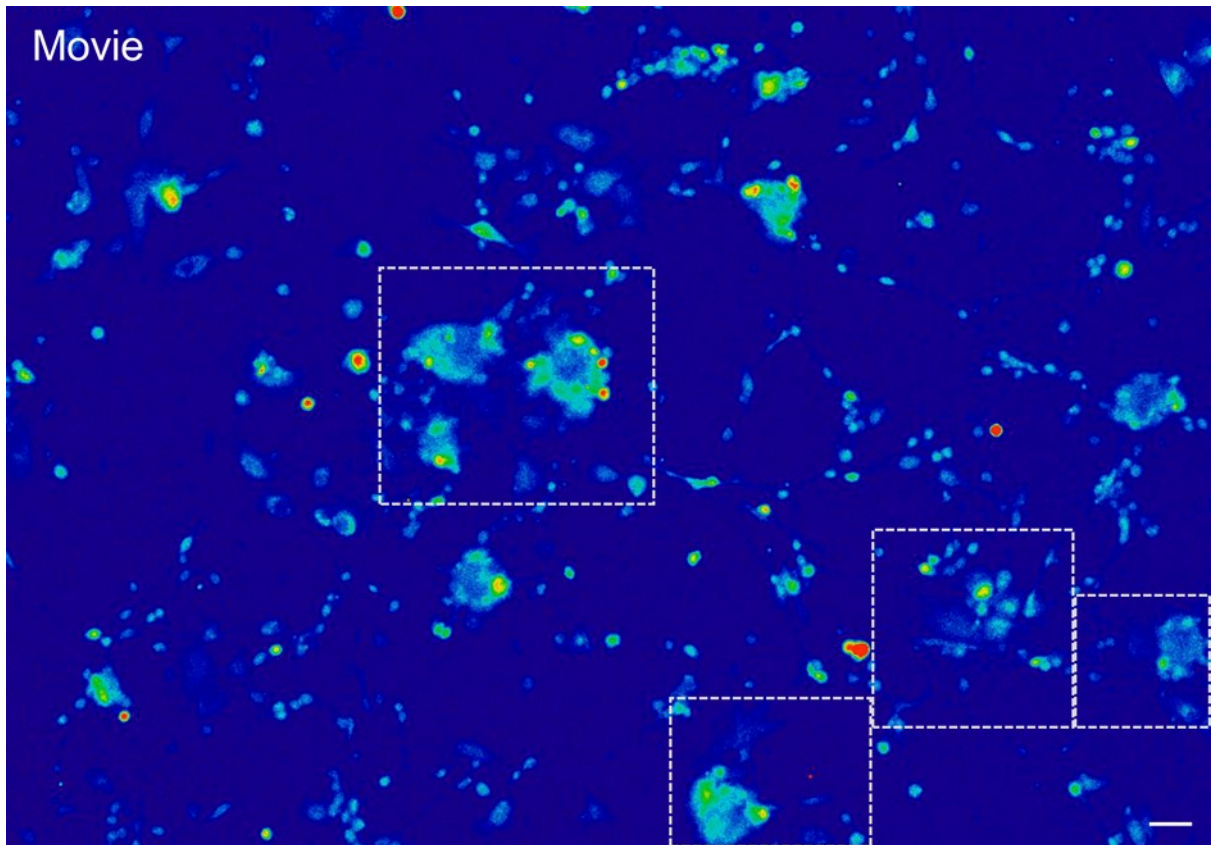

**Movie S4.** Movie clip of DNA-mediated taste and neuronal cells (30× fast, Fig. 7). Scale bar = 50  $\mu\text{m}$ .
